# Supplementary material for: Study on Phenotypic Variation and Diversity of Natural Polyspora Populations at Different Environmental Gradient, China
Source: Research Square preprint supplement (doi:10.21203/rs.3.rs-4596785/v1), 2024-07-11
Supplement: Supplementary file 1 [file cbbb6bf03f7ce306dc337d04.xlsx]

## Sheet: Table S1
Table S1 Sample collection information of Polyspora in China
Serial Number	Species	Provenance	Longitude	Latitude	Elevation /m	Vegetation Zone
1	P. chrysandra	Xinping(XP)	101°54′44.64″	24°3′51.36″	1810	ⅣBii
2		Shiping(SP)	102°27′17.09″	23°54′14.80″	2020	ⅣBii
3		Jinning(JN)	102°34′3.38″	24°39′51.06″	1960	ⅣBi
4		Chuxiong (CX)	101°2′34.83″	24°42′1.45″	1223	ⅣBi
5		Simao(SM)	100°53′42.20″	22°51′36.39″	1183	ⅣBii
6		Yongping(YPHY)	99°35′32.18″	25°9′55.85″	1929	ⅣBi
7		Fengqing(FQ)	99°59′13.54″	24°22′56.19″	2076	ⅣBii
8		Wenshan(WS)	104°7′24.47″	23°24′38.50″	1400	ⅣBii
9		Nanjian(NJ)	100°16′3.04″	24°54′26.53″	2051	ⅣBi
10	P. speciosa	Yanjin(YJ)	104°10′44.18″	28°2′6.51″	946	ⅣAiia
11		Beibei(BB)	106°23′14.43″	29°49′47.84″	821	ⅣAiia
12		Xuyong(XY)	105°29′21.56″	28°17′16.71″	686	ⅣAiia
13		Xishui(XS)	106°36′4.98″	28°24′46.73″	1370	ⅣAiia
14	P. tonkinensis	Pingbian(PB)	103°42′2.45″	22°54′38.64″	2048	ⅣBi
15	P.kwangsiensis	Yongfu(YF)	110°9′4.39″	24°52′39.36″	296	ⅣAiia
16		Jinxiu(JX)	110°12′41.32″	24°14′52.93″	1031	ⅣAiii
17		Gongcheng(GC)	110°56′23.3″	24°59′53.27″	460	ⅣAiia
18		Pinggui(PG)	111°32′34.92″	24°37′15.73″	617	ⅣAiia
19		Napo(NP)	105°47′29.04″	23°17′36.5″	1135	ⅣBi
20	P.tiantangensis	Changning(CN)	99°37′41.38″	24°56′57.18″	2167	ⅣBi
21	P. longicarpa	Yongping(YPCG)	99°30′59.74″	25°11′29.34″	2376	ⅣBi
22		Longyang(LY)	98°46′39.05″	24°49′8.92″	2127	ⅣBii
23	P. hainanensis	Ledong(LDHN)	108°51′29.03″	18°41′38.10″	617	ⅤAii
24		Lingshui(LS)	109°52′38.23″	18°43′9.30″	889	ⅤAii
25	P. axillaris	Ledong(LDDT)	108°52′35.10″	18°42′53.42″	1169	ⅤAii
26		Xiangzhou(XZ)	113°33′34.56″	22°18′59.32″	165	ⅣAi
27		Yangchun(YC)	111°32′54.08″	21°55′40.83″	32	ⅣAiii
28		Taishan(TS)	112°32′12.71″	21°53′33.90″	52	ⅣAi
29		Guangdong(DGD)	114°14′55.24″	22°1′47.34″	233	ⅣAi
30		Yantian(YT)	114°17′5.38″	22°36′40.65″	403	ⅣAi
31		Zijin(ZJ)	115°12′41.41″	23°43′0.79″	499	ⅣAiii
32		Jiexi(JXDT)	115°55′53.96″	23°32′47.4″	617	ⅣAiii
Note：Following the Provenance parenthesis is the code of the plant sample collection site.

## Sheet: Table S2
Table S2 Phenotypic traits of Polyspora
Serial number	Phenotypic traits	Units	Data acquisition	Serial number	Phenotypic traits	Units	Data acquisition
1	Petiole length(PL)	mm	Measurement	17	Sepal length(BL)	mm	Measurement
2	Leaf length(LL)	mm	Measurement	18	Sepal number(BN)	-	Measurement
3	Leaf width(LW)	mm	Measurement	19	Capsule length(CL)	mm	Measurement
4	Leaf shape index(LSI)	-	LL/LW	20	Capsule diameter(CD)	mm	Measurement
5	Petiole index(PI)	-	PL/LL	21	Capsule stem length(CSL)	mm	Measurement
6	leaf tip angle(LTA)	°	Measurement	22	Capsule shape index(CSHI)		CL/CD
7	Leaf base angle(LBA)	°	Measurement	23	Capsule stem index(CSI)	-	CSL/CL
8	Leaf perimeter(LP)	mm	Measurement	24	Capsule weight(CW)	g	Measurement
9	Leaf area(LA)	mm2	Measurement	25	Seed number(SN)	-	Measurement
10	Leaf roundness(LR)	-	（4π×LA）/LP²	26	Seed weight(SW)	g	Measurement
11	Flower diameter(FD)	mm	Measurement	27	Seed thickness(ST)	mm	Measurement
12	Petal length(PEL)	mm	Measurement	28	Wing width(WD)	mm	Measurement
13	Petal width(PEW)	mm	Measurement	29	Wing length(WL)	mm	Measurement
14	Petal number(PEN)	-	Measurement	30	Seed length(include wing)(SWL)	mm	Measurement
15	Pedicel length(PDL)	mm	Measurement
16	Style height(SH)	mm	Measurement	31	Wing shape index(WSI)	-	WL/SWL

## Sheet: Table S3
Table S3 Selection and coding of morphological phylogenetic traits
Code	Phenotypic traits	Trait status and coding
A	Spray	piliferous/0；smooth/1
B	Terminal bud	piliferous/0；smooth/1
C	Leaf length	≥14cm /0；＜14cm /1
D	Petiole length	≤1cm/0；1-1.5cm /1；1.5-2cm/2；≥2cm /3
E	Blade back	piliferous/0；smooth/1
F	Leaf margin	Leaf blade subentire/0；Leaves semi-serrate/1；Leaves serrated/2
G	Leaf texture	thick leather/0；thin leather/1
H	Flower diameter	≥8cm /0；5-8cm /1；＜5cm/ 2
I	Pedicel length	≤3mm /0；3-5mm /1；≥5mm /2
J	Style height	≤1cm 0；1-1.5cm /1；1.5-2cm /2；≥2cm /3
K	Sepal length	≤1cm 0；1-1.5cm /1；1.5-2cm/2；≥2cm/ 3
L	Number of bracts	6~7/ 0；4~5/1；2~3/2
M	Number of atrial chambers	6~8/0；5/1
N	Capsule length	≥3.5cm /0；2.5-3.5cm/1；≤2.5cm/2
O	Wing length	≤1.5cm/ 0；1.5-2cm/1；≥2cm /2

## Sheet: Table S4
Table S4 Phenotypic variability analysis of Polyspora leaves
Traits	Units	P. axillaris	P. chrysandra	P. hainanensis	P. longicarpa	P. tiantangensis	P. speciosa	P. kwangsiensis	P. tonkinensis
PL	mm	11.08±3.58 f	9.05±2.91 g	10.88±3.36 f	14.05±5.83 d	12.35±3.88 e	21.91±4.88 a	18.27±3.93 b	16.64±3.21 c
LL	mm	136.60±32.52 e	122.86±25.13 f	161.68±34.03 d	181.64±42.93 c	175.33±19.66 c	227.38±40.08 a	203.54±34.62 b	209.55±25.10 b
LW	mm	43.98±12.56 e	42.44±9.25 e	43.40±9.02 e	70.03±18.24 a	66.78±12.80 ab	63.80±12.26 bc	60.55±9.31 c	50.91±7.78 d
LSI	-	3.19±0.54 d	2.96±0.59 e	3.75±0.52 b	2.68±0.58 f	2.70±0.44 f	3.60±0.44 b	3.40±0.54 c	4.17±0.55 a
PI	-	0.08±0.02 c	0.07±0.02 de	0.07±0.02 e	0.08±0.02 cde	0.07±0.02 e	0.10±0.02 a	0.09±0.02 b	0.08±0.02 cd
LTA	°	91.56±26.25 a	76.43±19.59 b	42.38±19.70 e	69.55±28.28 c	68.81±26.04 c	36.39±13.10 e	55.21±20.91 d	37.38±12.29 e
LBA	°	51.91±18.06 c	66.69±14.25 a	36.65±13.01 e	61.31±14.92 b	70.65±15.66 a	46.45±10.41 d	57.75±16.90 b	44.34±11.68 d
LP	mm	336.16±79.93 f	298.90±58.62 g	391.87±82.85 e	469.98±112.77 d	466.52±59.19 d	562.3±96.96 a	496.72±77.91 c	521.29±63.20 b
LA	mm2	4082.70±2141.77 ef	3504.21±1357.41 f	4228.38±1642.30 e	8391.51±3572.44 ab	7670.59±1991.27 c	8718.17±2780.33 a	7743.34±2215.05 bc	6600.70±1731.31 d
LR	-	0.43±0.06 b	0.48±0.06 a	0.34±0.06 d	0.46±0.07 a	0.43±0.04 b	0.34±0.04 d	0.39±0.06 c	0.30±0.04 e

## Sheet: Table S5
Table S5 Variance components and phenotypic differentiation coefficients of Polyspora
Species	Traits	Average variance			Percentage of variance components(%)			Phenotypic differentiation coefficient (%)
		Inter-group	In-group	Random Error	Inter-group	In-group	Random Error
P. axillaris	PL	89.5426	70.1512	9.3386	5.92	37.1	56.98	13.76
	LL	13702.8	7955.31	292.111	21.35	56.94	21.71	27.27
	LW	1704.53	1115.14	40.0707	16.65	60.72	22.63	21.52
	LSI	2.5006	0.5585	0.1937	29.67	11.15	59.18	72.68
	PI	0.0064	0.0008	0.0005	35.56	4.02	60.42	89.84
	LTA	7363.15	874.037	457.376	39.4	5.06	55.54	88.62
	LBA	2707.33	514.347	275.735	26.79	5.83	67.38	82.13
	LP	73636.6	45456.3	1653.38	18.93	58.85	22.21	24.34
	LA	49800000	34100000	1010000	15.36	64.92	19.72	19.13
	LR	0.0245	0.009	0.003	17.67	13.4	68.93	56.87
	CL	54.1104	7.1986	7.3022	24.31	0	75.69	100
	CSL	3.4453	2.2319	2.019	2.89	1.01	96.1	74.1
	CSTI	0.0048	0.0033	0.0029	2.56	1.5	95.93	63.05
	SW	0.0326	0.0007	0.0002	85.29	2.51	12.2	97.14
	ST	0.2211	0.0893	0.0778	7.7	1.34	90.96	85.18
	SWL	62.819	9.0429	2.9847	42.82	9.65	47.53	81.61
	WL	54.3852	6.8057	2.0544	48.47	9.68	41.85	83.35
	WD	14.8753	0.6096	0.3837	63.71	2.02	34.27	96.93
	WSI	0.353	0.0918	0.0819	13.61	1.03	85.36	92.96
	Mean	-	-	-	27.3	18.25	54.45	66.87
P. chrysandra	PL	279.792	27.8805	3.3755	26.12	20.5	53.38	56.03
	LL	12813.3	5821.66	314.239	7.17	44.66	48.16	13.83
	LW	1808.09	498.629	36.467	12.44	35.15	52.41	26.14
	LSI	5.8292	1.8295	0.1674	9.39	31.2	59.4	23.13
	PI	0.024	0.003	0.0008	13.53	11.88	74.59	53.25
	LTA	1763.96	1344.91	317.297	1.8	17.36	80.84	9.39
	LBA	860.522	1297.38	140.359	0	35.34	64.66	0
	LP	48031.8	9032.59	2034.14	28.87	13.21	57.92	68.61
	LA	26800000	5760000	1030000	28.82	16.64	54.54	63.4
	LR	0.0241	0.0171	0.0028	3.33	24.79	71.88	11.84
	FD	1896.39	275.76	68.55	27.76	27.19	45.05	50.52
	PEL	212.653	68.1805	27.4642	9.7	20.62	69.68	31.99
	PEW	322.157	83.5885	28.9625	13.61	23.63	62.76	36.55
	PEN	3.8514	0.077	0.1072	47.51	0	52.49	100
	PDL	6.8435	12.9323	2.1508	0	50.02	49.98	0
	SH	40.8907	23.1781	6.2026	4.96	33.58	61.46	12.87
	SL	1230.05	35.4797	3.7474	75.35	15.49	9.16	82.95
	BN	6.2607	0.5213	0.1832	37.2	16.9	45.89	68.76
	CL	2375.47	171.194	11.3362	36.31	26.34	37.35	57.96
	CD	405.314	27.4869	1.551	39.88	27.38	32.74	59.29
	CSL	249.498	33.1776	2.5926	20.79	29.39	49.82	41.43
	CSHI	3.3379	0.8049	0.0807	9.77	27.94	62.29	25.91
	CSTI	0.1513	0.037	0.0037	9.6	27.97	62.43	25.55
	CW	156.93	15.5003	0.9222	29.99	30.91	39.1	49.24
	SN	221.661	61.6796	8.5685	6.65	22.09	71.26	23.14
	SW	1.4504	0.055	0.0028	56.38	21.1	22.52	72.77
	ST	10.6913	0.6081	0.0332	44.88	25.59	29.53	63.69
	SWL	1585.3	110.563	4.4993	42.93	30.88	26.2	58.16
	WL	681.841	99.0019	4.2101	24.56	39.95	35.49	38.07
	WD	38.9665	6.0153	0.2008	25.1	44.3	30.6	36.17
	WSI	4.0131	3.0644	0.1567	1.55	47.38	51.07	3.17
	Mean	-	-	-	22.45	27.08	50.47	40.77
P. hainanensis	PL	663.441	34.121	4.1765	11.39	64.06	24.55	15.1
	LL	454.608	12033	661.454	52.65	0	47.35	100
	LW	1631.79	621.841	41.9721	39.5	16.3	44.2	70.79
	LSI	16.4767	0.277	0.1223	2.41	68.13	29.45	3.42
	PI	0.0336	0.001	0.0002	5.72	68.44	25.84	7.71
	LTA	20799.8	461.805	195.718	3.03	62.5	34.47	4.62
	LBA	9142.8	68.5502	90.8572	0	63.62	36.38	0
	LP	6626.19	68844.8	3996.49	51.21	0	48.79	100
	LA	21700000	24400000	1520000	49.36	0	50.64	100
	LR	0.2133	0.0022	0.0013	1.1	72.95	25.94	1.49
	Mean	-	-	-	21.64	41.6	36.76	40.31
P. speciosa	PL	103.249	43.1195	20.9418	8.12	6.77	85.11	54.53
	LL	7083.63	9439.85	1214.85	0	33.72	66.28	0
	LW	867.959	293.535	124.874	12.45	8.07	79.48	60.67
	LSI	0.5212	0.542	0.1784	0	13.28	86.72	0
	PI	0.0053	0.0016	0.0004	20.72	16.22	63.06	56.09
	LTA	1462.44	39.8044	137.516	28.26	0	71.74	100
	LBA	1780.51	34.2271	61.357	51.62	0	48.38	100
	LP	62872.1	43335.5	6831.43	3.26	27.71	69.02	10.53
	LA	36500000	35900000	6060000	0	26.99	73.01	0
	LR	0.0061	0.0004	0.0016	12.48	0	87.52	100
	Mean	-	-	-	13.69	13.28	73.03	48.18
P. kwangsiensis	PL	22.2945	88.3329	12.8006	0	29.14	70.86	0
	LL	11555	13238	502.404	0	63.86	36.14	0
	LW	443.667	461.075	64.1345	0	30.14	69.86	0
	LSI	1.0589	0.4659	0.2606	6.32	4.88	88.81	56.43
	PI	0.0009	0.0009	0.0003	0	12.85	87.15	0
	LTA	3173.27	349.112	365.424	20.44	0	79.56	100
	LBA	1087.17	625.707	252.059	4.54	8.94	86.52	33.68
	LP	56511.1	60663.2	2818.35	0	58.85	41.15	0
	LA	42700000	53000000	2220000	0	61.43	38.57	0
	LR	0.0182	0.0041	0.0027	14.18	3.06	82.76	82.25
	CL	104.084	544.128	7.7643	0	77.55	22.45	0
	CSL	57.9674	4.5495	2.3518	47.48	2.34	50.17	95.3
	CSTI	0.0345	0.0607	0.0038	0	43.05	56.95	0
	SW	0.0065	0.0106	0.0004	0	57.81	42.19	0
	ST	0.2485	0.6682	0.0685	0	30.44	69.56	0
	SWL	355.616	46.6992	2.9957	71.3	12.1	16.59	85.49
	WL	238.916	65.6897	2.7349	55.1	24.03	20.88	69.63
	WD	8.2117	1.444	0.6591	28.77	4	67.23	87.79
	WSI	2.5399	1.0563	0.1071	28.57	21.93	49.5	56.57
	Mean	-	-	-	14.56	28.76	56.68	35.11
P. longicarpa	PL	278.776	401.327	15.2253	0	59.03	40.97	0
	LL	2082.82	28823.9	581.859	0	73.39	26.61	0
	LW	760.783	4993.9	112.187	0	71.2	28.8	0
	LSI	3.2113	2.6664	0.2031	3.67	39.31	57.03	8.54
	PI	0.0039	0.0021	0.0004	7.7	20.65	71.65	27.16
	LTA	5148.49	6070.09	524.995	0	37.51	62.49	0
	LBA	1396.98	1467.66	156.584	0	32.24	67.76	0
	LP	18432.8	207683	3581.53	0	76.41	23.59	0
	LA	162.454	203000000	3990000	0	73.89	26.11	0
	LR	0.0534	0.0383	0.003	6.33	37.3	56.38	14.51
	Mean	-	-	-	1.77	52.09	46.14	5.02

## Sheet: Table S6
Table S6 Principal component analysis of leaf, capsule, and seed traits in Polyspora
Traits	Principal component
	PC1	PC2	PC3	PC4	PC5	PC6
LA	0.856	-0.2806	0.2623	0.1312	-0.2423	-0.0182
LP	0.8435	-0.4679	0.0909	0.1035	-0.1588	-0.0693
LL	0.814	-0.5291	0.047	0.0715	-0.1289	-0.098
LW	0.8046	-0.0379	0.457	0.1307	-0.2285	0.0453
WL	0.6828	0.5315	-0.1539	-0.4035	0.058	-0.0868
CSL	0.6713	0.306	-0.2828	0.1517	0.2306	0.4825
PL	0.6285	-0.4249	0.4491	-0.0379	0.3904	-0.1859
SWL	0.6239	0.608	-0.1839	-0.292	0.0573	-0.1242
LTA	-0.5688	0.409	0.3395	0.0819	0.2162	0.1789
WD	0.5615	0.5404	-0.1899	0.2559	0.2408	-0.1907
CL	0.3534	0.7188	-0.2847	0.172	0.0385	-0.1436
LR	-0.236	0.6887	0.4976	0.0092	-0.1826	0.0947
SW	0.4481	0.6869	-0.3034	0.2541	0.0663	-0.0011
LSI	0.0574	-0.6425	-0.6292	-0.0489	0.0991	-0.1742
LBA	0.1858	0.4797	0.567	0.1093	-0.2995	0.0535
WSI	0.356	0.1667	-0.0129	-0.8499	-0.1793	0.0767
ST	0.1147	0.0951	-0.044	0.3543	0.0468	-0.1974
PI	0.0722	-0.0486	0.6099	-0.1771	0.7197	-0.179
CSTI	0.4712	-0.3686	-0.0628	0.009	0.2385	0.717
Eigenvalue	5.8803	4.2455	2.2948	1.3826	1.2176	1.0292
Contribution rate(%)	30.949	22.3445	12.078	7.277	6.4083	5.4169
Cumulative contribution rate(%)	30.949	53.2936	65.3715	72.6486	79.0569	84.4738
Note: Numbers in bold represent the highest loadings along each axis.

## Sheet: Table S7
Table S7 Phylogenetic signals of morphological traits of Polyspora
Phenotypic trait	K	P value-K	K.star	P value-K.star	Lambda	P value-Lambda
A	0.8813	0.054	1.1376	0.048	1.0376	0.001
B	0.5398	0.061	0.9351	0.061	1.0375	0.001
C	1.2467	0.027	1.2235	0.048	1.0376	0.001
D	0.8825	0.013	0.8388	0.023	0.9831	0.0073
E	0.8982	1	0	1	0.7448	NA
F	0.1385	0.678	0.2787	0.508	0.0001	1
G	0.4653	0.224	0.9548	0.115	1.0376	0.001
H	1.8862	0.005	1.1437	0.013	0.9573	0.001
I	0.4201	0.111	0.8774	0.015	1.0375	0.001
J	2.2614	0.002	1.5545	0.004	1.0285	0.001
K	2.3019	0.003	2.1184	0.001	1.0376	0.001
L	1.8798	0.004	1.1121	0.008	1.0376	0.001
M	0.0952	0.653	0.1804	0.646	0.0001	1
N	3.3716	0.001	1.8785	0.001	1.0376	0.001
O	2.8465	0.008	2.1813	0.001	1.0376	0.001
